# Supplementary material
Source: publisher figshare collection journal article supplement (https://acs.figshare.com/ndownloader/files/7515001)

# **Molecular Details of the PH domain of ACAP1<sup>BAR-PH</sup> Protein Binding to PIP-containing Membrane**

**Kevin Chun Chan<sup>1</sup>, Lanyuan Lu<sup>2</sup>, Fei Sun<sup>3,4</sup>, Jun Fan<sup>\*,1,5,6</sup>**

<sup>1</sup>Department of Physics and Materials Science, City University of Hong Kong, Hong Kong, China;

<sup>2</sup>School of Biological Sciences, Nanyang Technological University, Singapore;

<sup>3</sup>National Laboratory of Biomacromolecules, Institute of Biophysics, Chinese Academy of Sciences, Beijing 100101, China;

<sup>4</sup>Center for Biological Imaging, Institute of Biophysics, Chinese Academy of Sciences, Beijing 100101, China;

<sup>5</sup>City University of Hong Kong Shenzhen Research Institute, Shenzhen 518057, China

<sup>6</sup>Center for Advanced Nuclear Safety and Sustainable Development, City University of Hong Kong, Hong Kong, China;

## Supporting Information

Figure S1 displays the Root-Mean Square Deviation (RMSD) profiles of the five MD simulations (namely sim1-5) in order to show the convergence of the simulations. Convergence of the US simulations was shown in Figure S2 by calculating profiles of 30 ns intervals in 10 ns sliding blocks. Histograms of the last 50 ns interval were displayed to the right of the PMF profiles.

Figure S1.

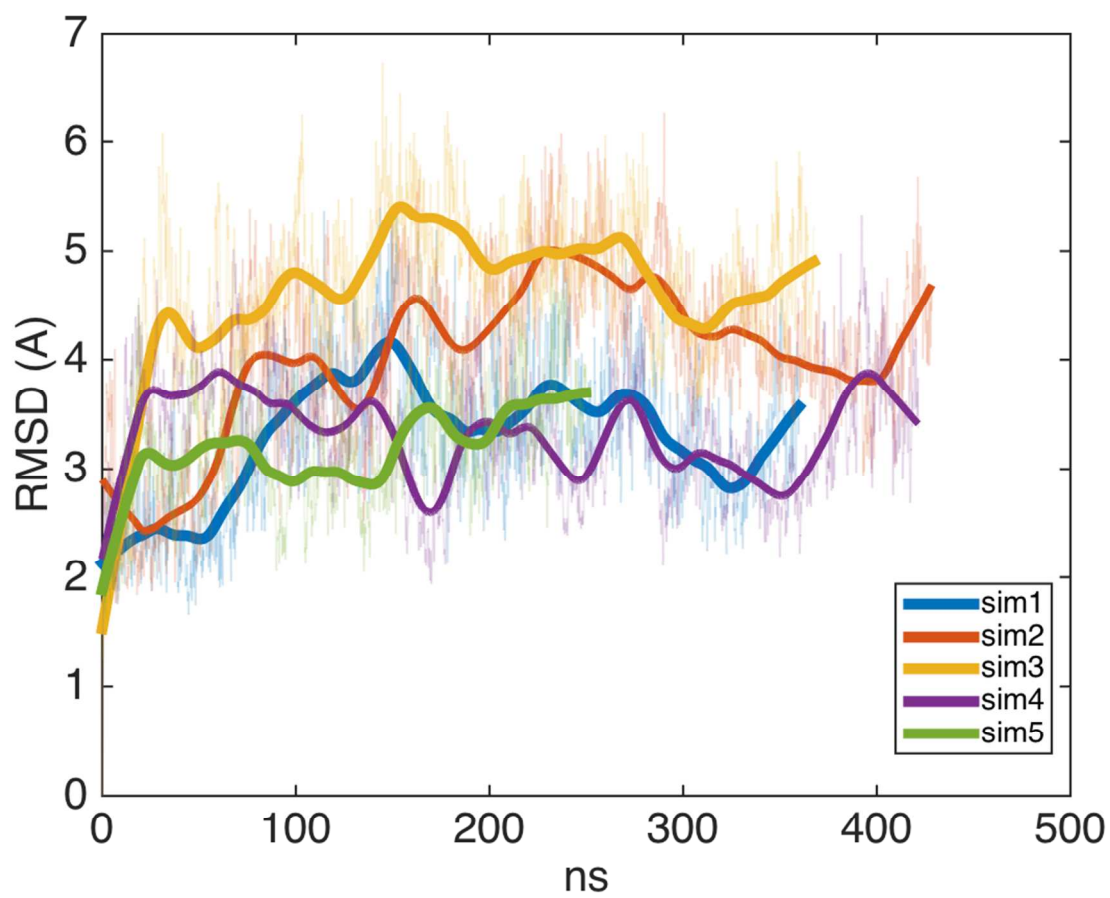

Figure S2.

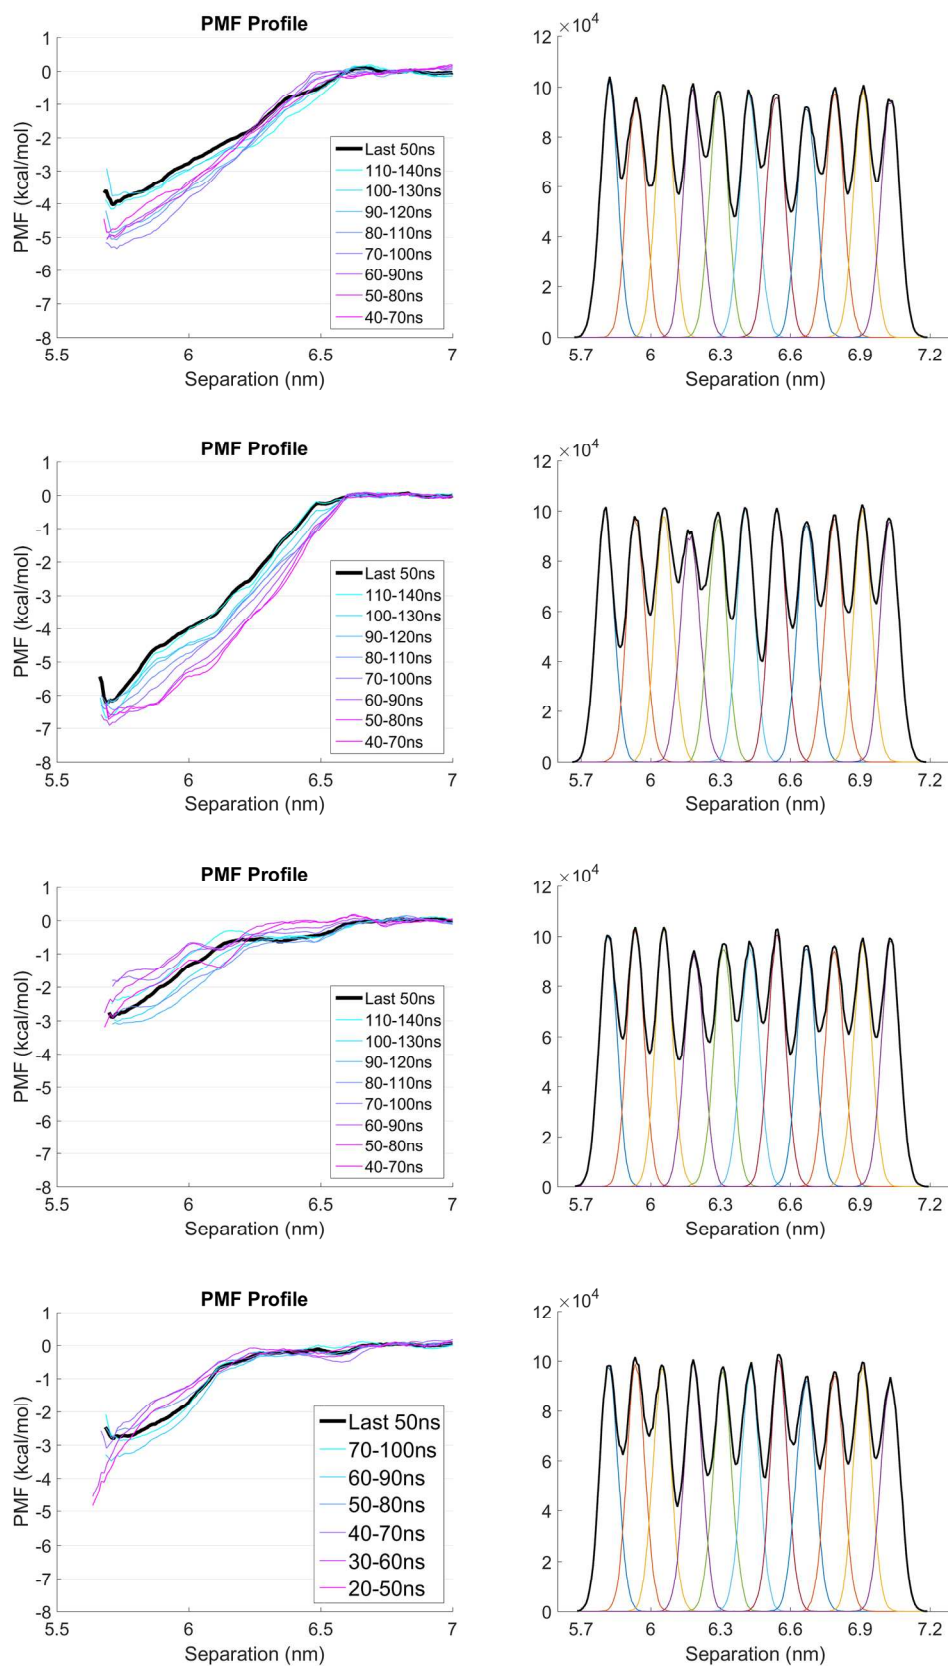

Supplement: Supplementary file 1 [file 7515001]
